# Supplementary material
Source: PubMed Central journal article supplement (PMC6519129)
Supplement: NIHMS969010-supplement-1.pdf [file NIHMS969010-supplement-1.pdf]

## Supplementary Information

### Experimental evidence for rapid genomic adaptation to a new niche in an adaptive radiation

David A. Marques, Felicity C. Jones, Federica Di Palma, David M. Kingsley & Thomas E. Reimchen

#### *Table of contents*

|                             |    |
|-----------------------------|----|
| Supplementary Results.....  | 2  |
| Supplementary Figures ..... | 2  |
| Supplementary Data.....     | 14 |

## Supplementary Results

**Genomic change at sites of different functional categories.** Absolute divergence measured by the proportion of fixed differences among polymorphic sites between pairs of individuals in the selection experiment increased 25-29% compared to lake and stream ecotypes and 6-8% compared to Mayer Lake vs. small pond populations, in similar magnitude for non-synonymous, synonymous, intron, regulatory and intergenic sites (Supplementary Fig. 1).

## Supplementary Figures

**Supplementary Figure 1 | Proportion of fixed differences between two individuals for different SNP categories.** The left panel shows the distribution of mean absolute divergence as in Fig. 4 for comparison. The other panels depict the percentage of fixed differences for missense mutations, synonymous mutations, intron, regulatory and intergenic variation.

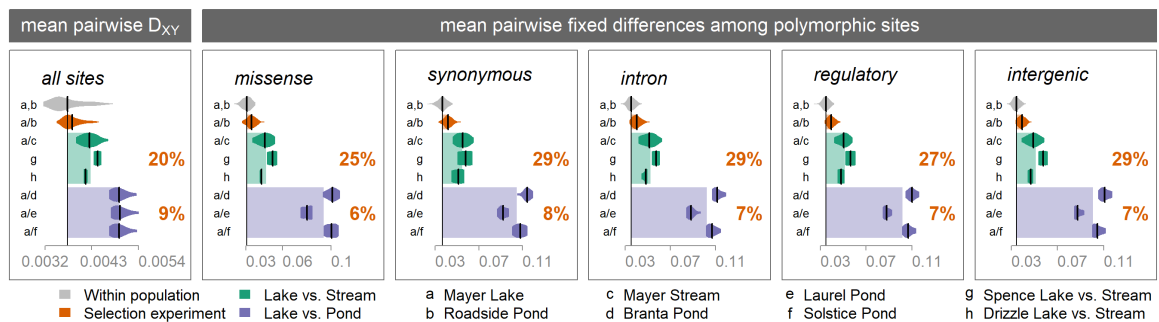

**Supplementary Figure 2 | Reconstruction of demographic history based on the 2D-site-frequency spectrum (SFS).** **a** Observed and simulated 2D-SFS under the best demographic model (see below) and marginal 1D-SFS for each population, with entries containing the sum of entries over the folded 2D-SFS for each population. **b** We fit twelve demographic models to the observed folded 2D-SFS between Mayer Lake and Roadside Pond to estimate maximum-likelihood parameters for the simulation of neutral data. The best-fitting demographic model features a bottleneck corresponding to the timing of postglacial colonization and a recent expansion of the transplant population, in line with biogeographic predictions and census data.  $\Delta LL$ : log-likelihood difference for each model between observed and expected 2D-SFS;  $\Delta AIC$ : differences between models for the Akaike information criterion.

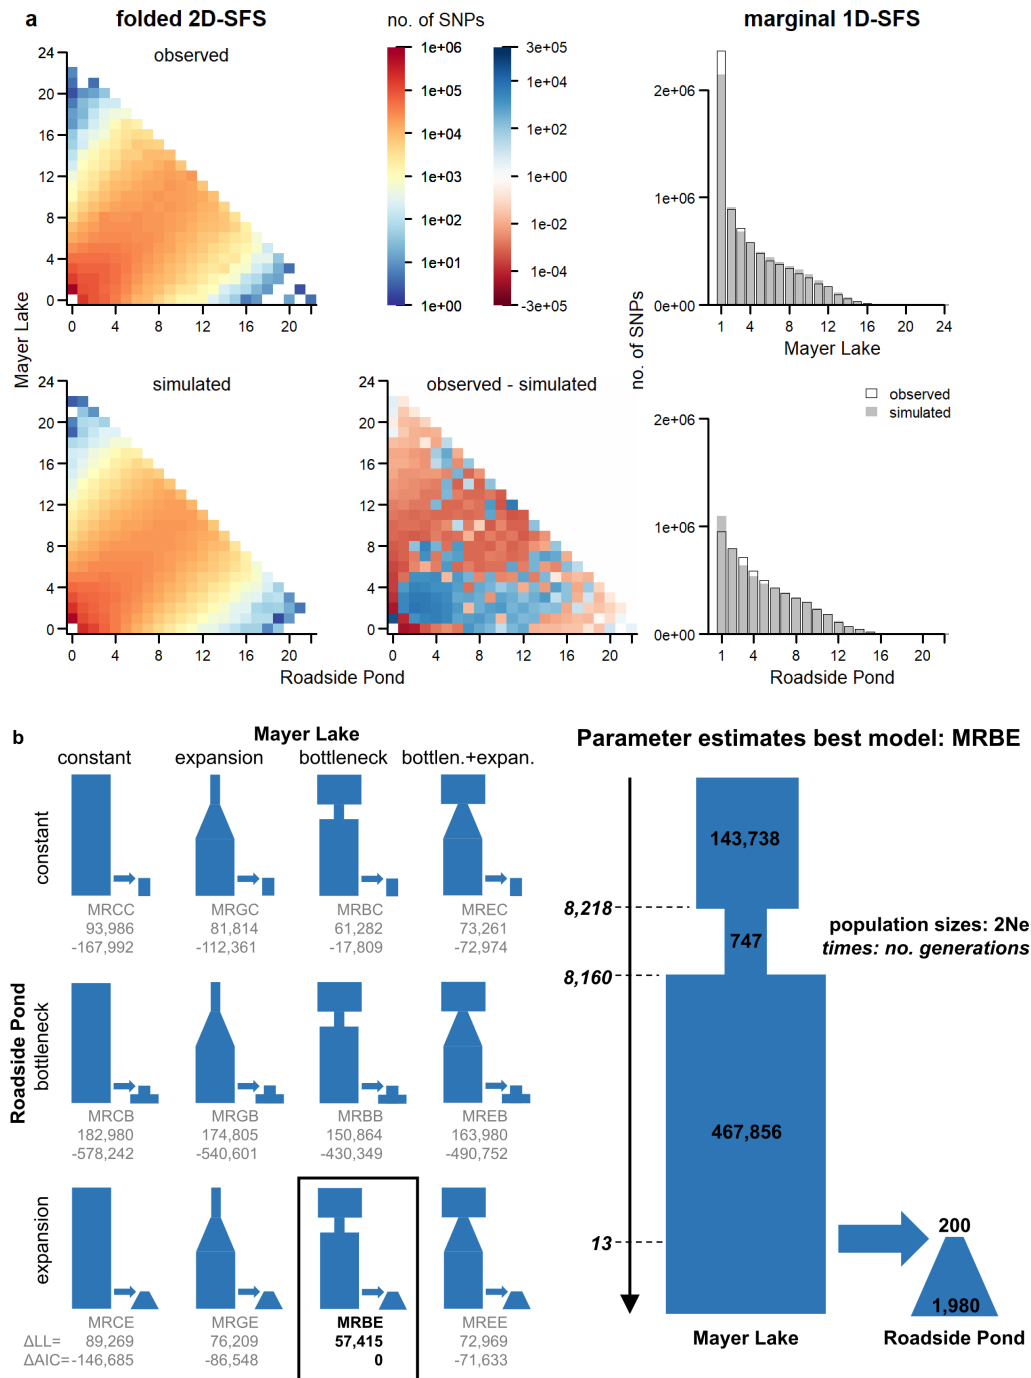

**Supplementary Figure 3 | Recombination-rate based cut-offs to identify outlier windows.** The lower panels show the distribution of differentiation ( $F_{ST}$ ), change in diversity ( $\Delta\pi$ ) and Tajima's D ( $\Delta T_D$ ), iHS and XP-EHH and the respective recombination-rate bin based (0–0.05, 0.05–1.5, 1.5–4, >4 cM/Mb) one- or two-sided cut-offs to identify outlier windows (dark brown dots) at the 1%-alpha level against neutral distributions of these statistics (see Supplementary Fig. 4). The upper panels show the correlation of nucleotide diversity and Tajima's D 10 kb window statistics between the two populations with outlier windows highlighted in dark brown. Note the strongly -shifted Tajima's D distribution in Roadside Pond.

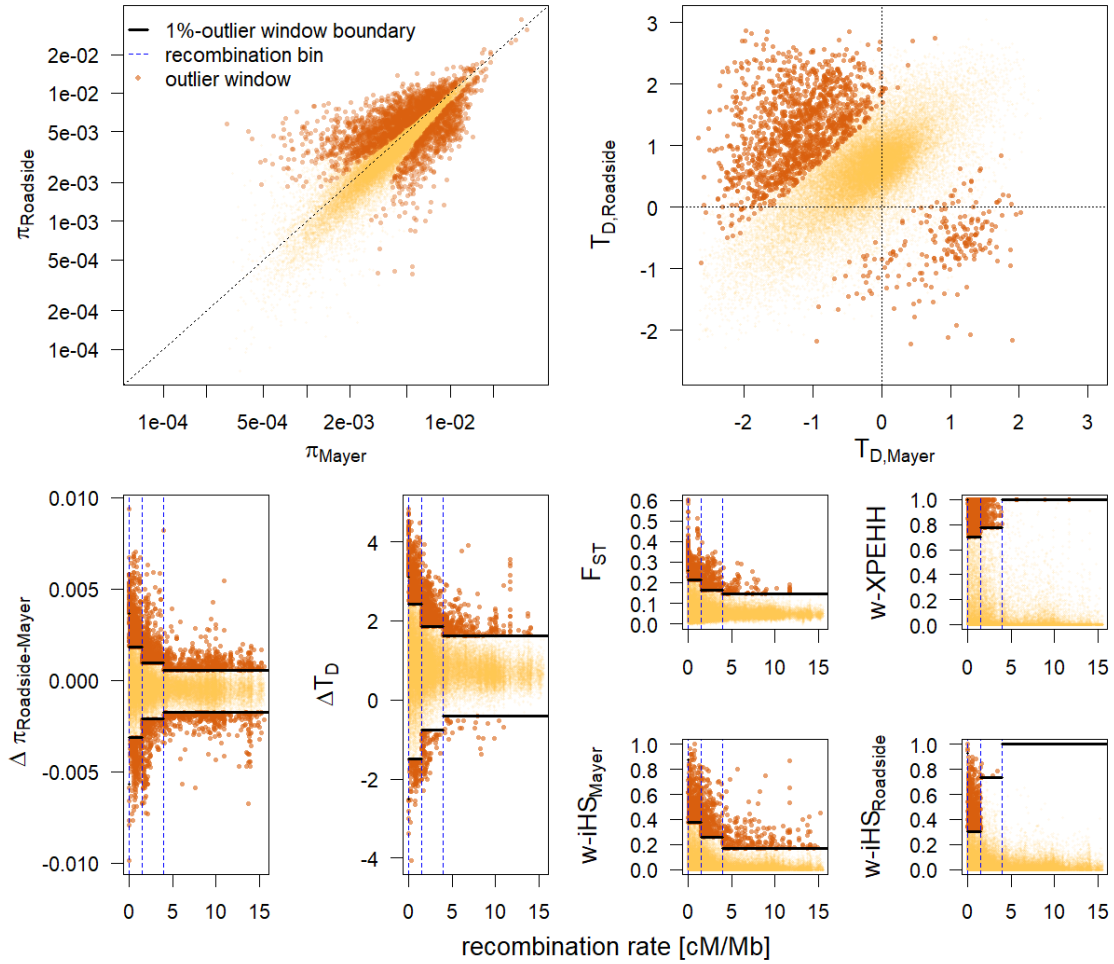

**Supplementary Figure 4 | Distribution of observed and simulated summary statistics under the best demographic model.** Shown are distributions of 10kb-window statistics in observed and simulated data, for each of four recombination rate bins: differentiation ( $F_{ST}$ ) between Mayer Lake and Roadside Pond, nucleotide diversity in both populations ( $\pi_{Mayer}$ ,  $\pi_{Roadside}$ ) and between populations ( $\Delta\pi_{Roadside-Mayer}$ ), Tajima's D in both populations ( $T_{D,Mayer}$ ,  $T_{D,Roadside}$ ) and between populations ( $\Delta T_{D,Roadside-Mayer}$ ), as well as the haplotype-based selection statistics iHS in each population ( $w-iHS_{Mayer}$ ,  $w-iHS_{Roadside}$ ) and XP-EHH between populations ( $w-XP-EHH$ ). Vertical lines depict boundaries for the 1% most extreme windows in the simulated (blue) and observed (grey) data.

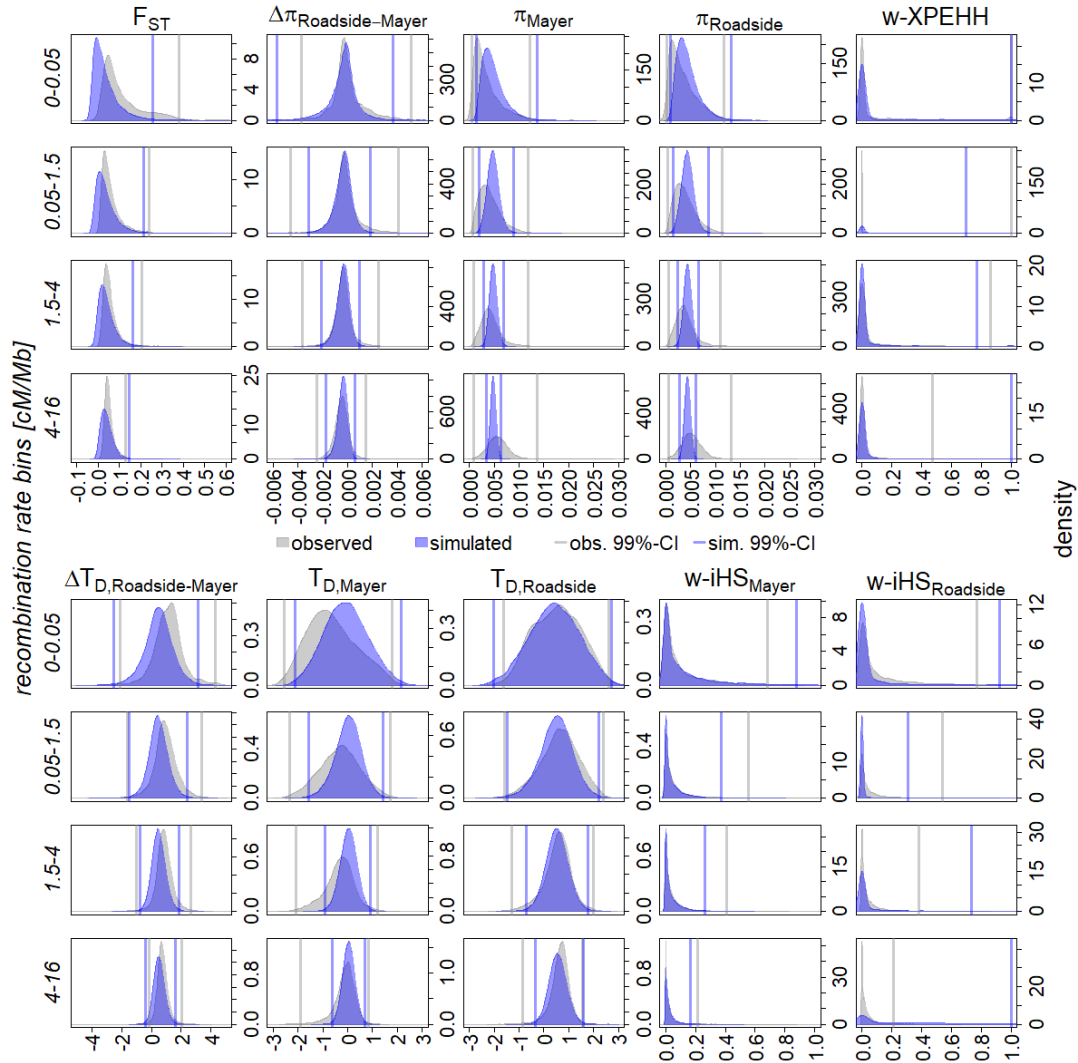

Supplementary Figure 5 | Local signatures of divergent selection on candidate genes. See Fig. 3 legend.

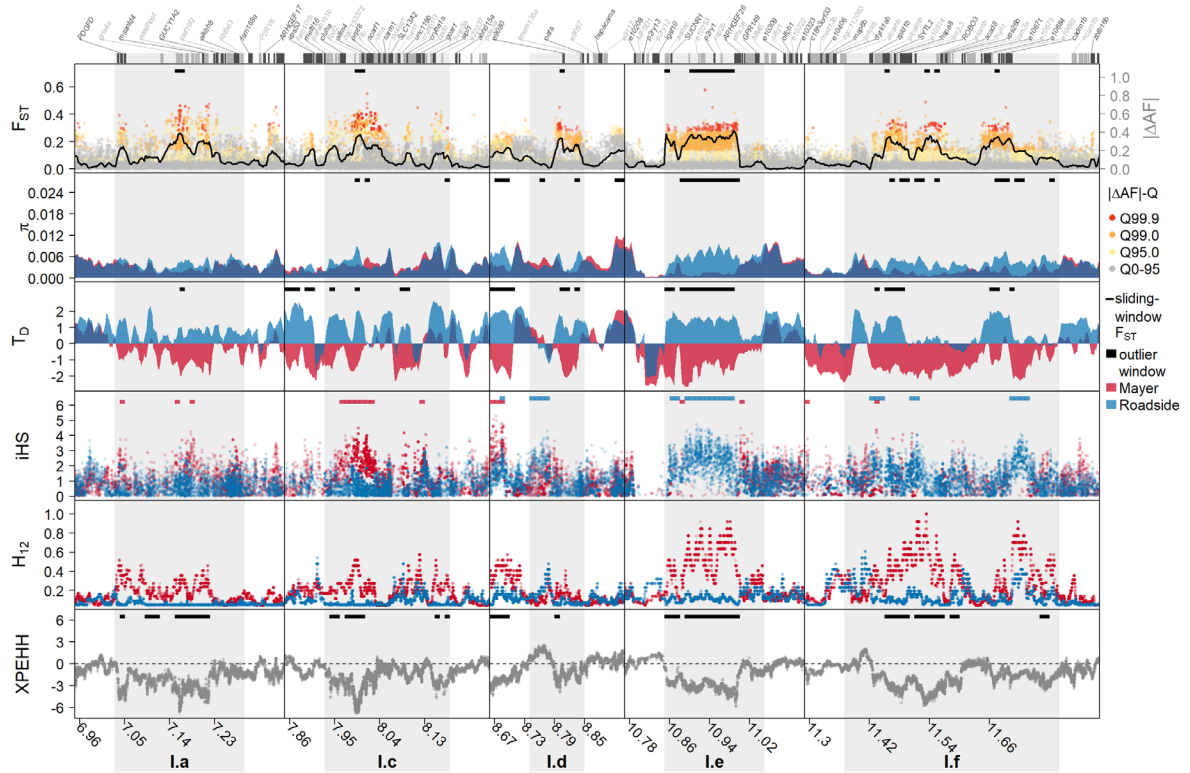

Supplementary Figure 6 | Local signatures of divergent selection on candidate genes. See Fig. 3 legend.

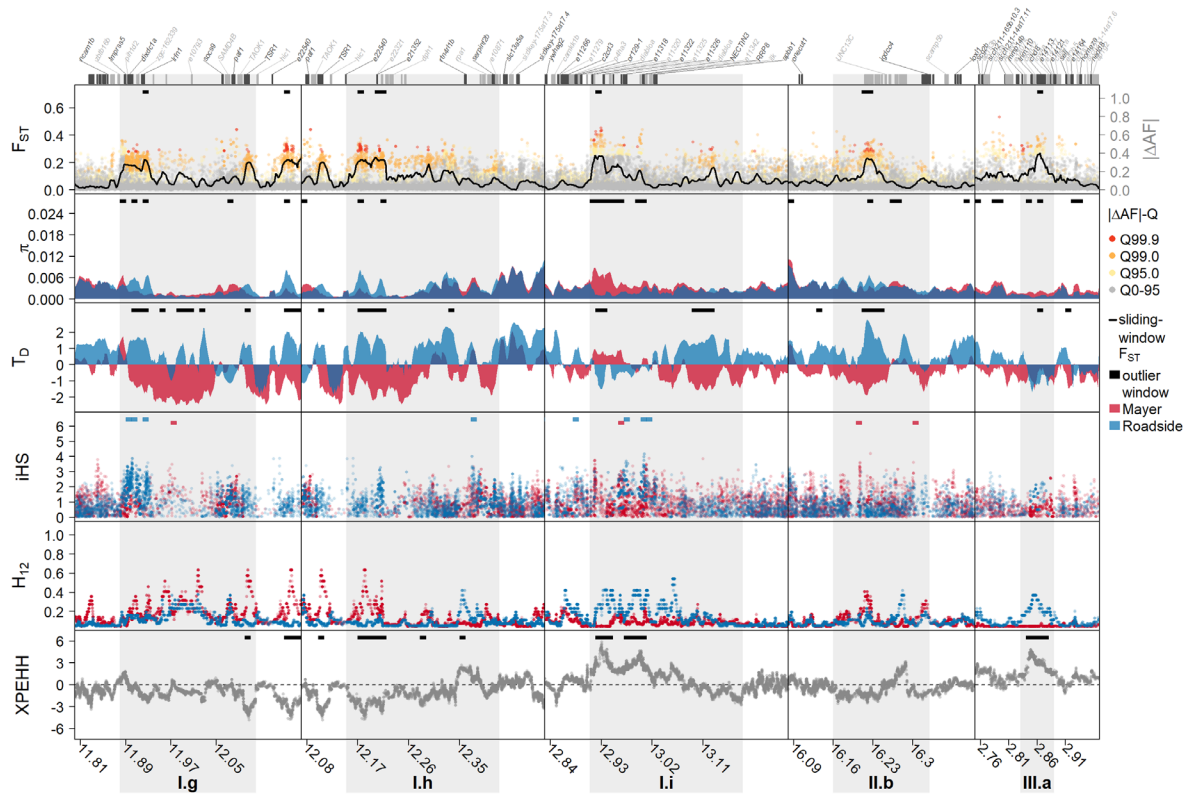

Supplementary Figure 7 | Local signatures of divergent selection on candidate genes. See Fig. 3 legend.

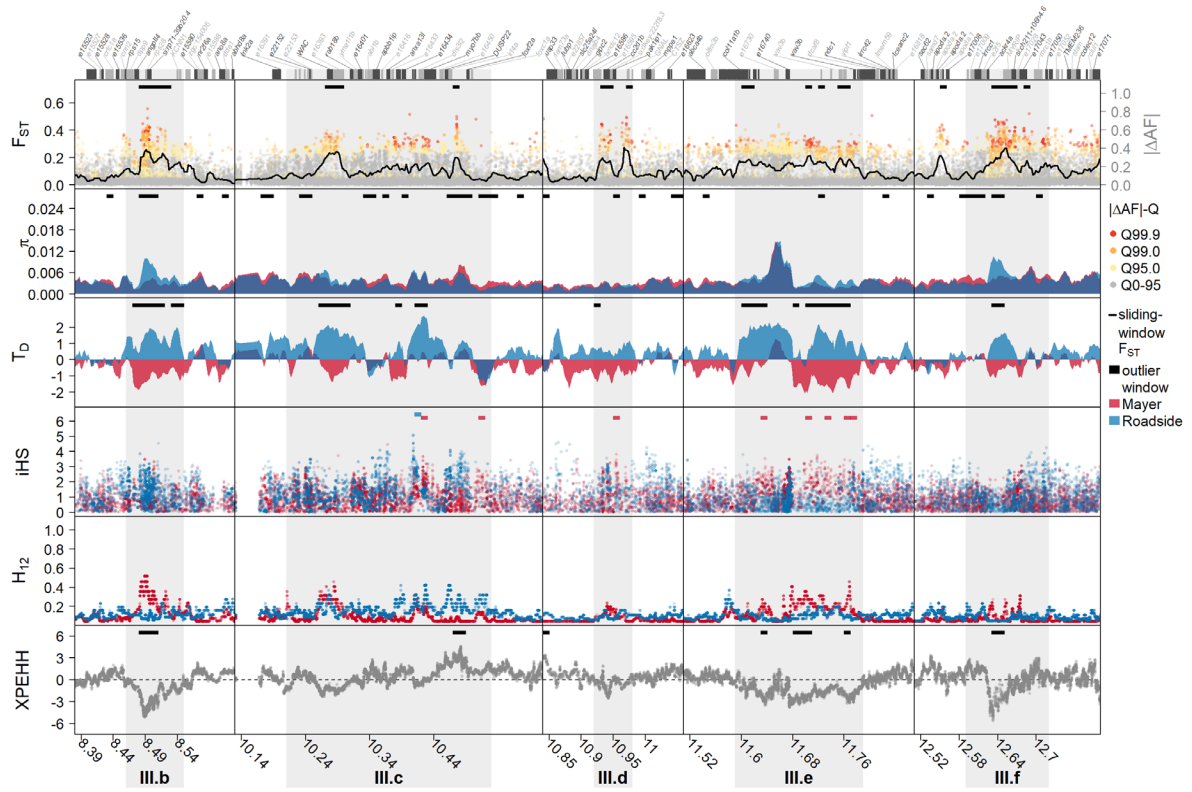

Supplementary Figure 8 | Local signatures of divergent selection on candidate genes. See Fig. 3 legend.

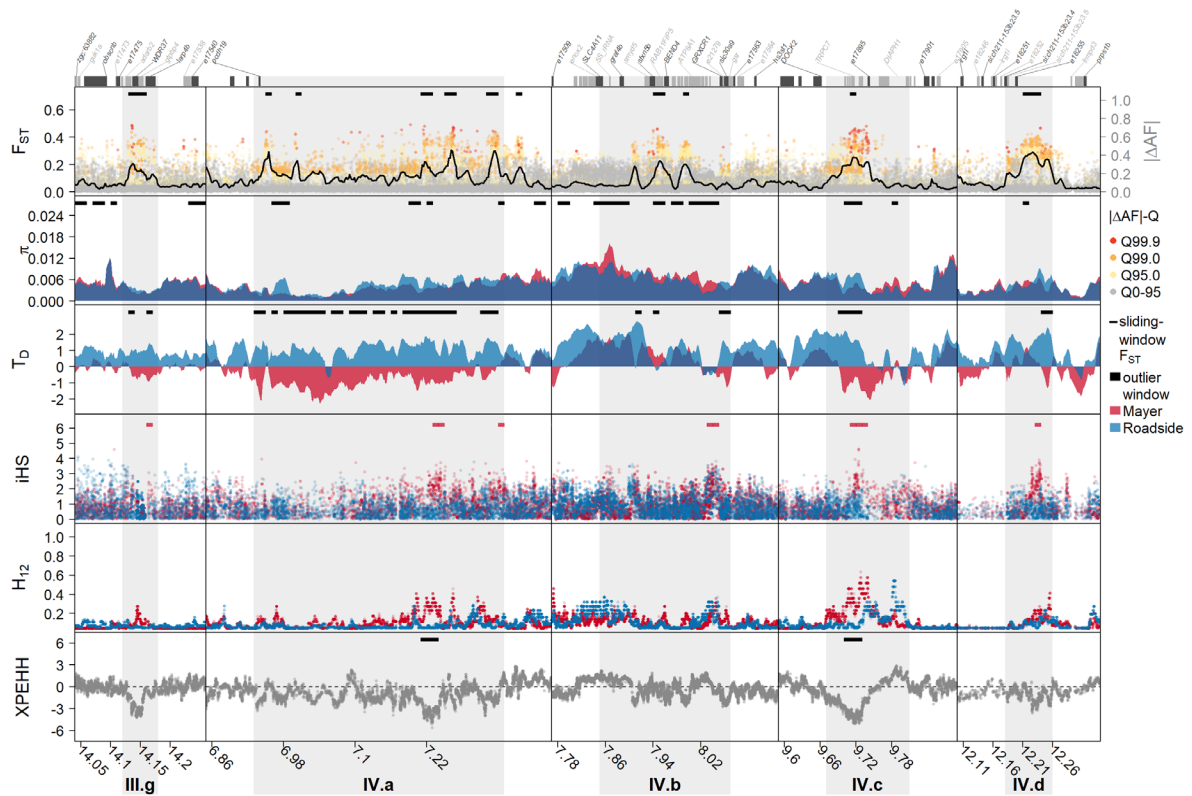

Supplementary Figure 9 | Local signatures of divergent selection on candidate genes. See Fig. 3 legend.

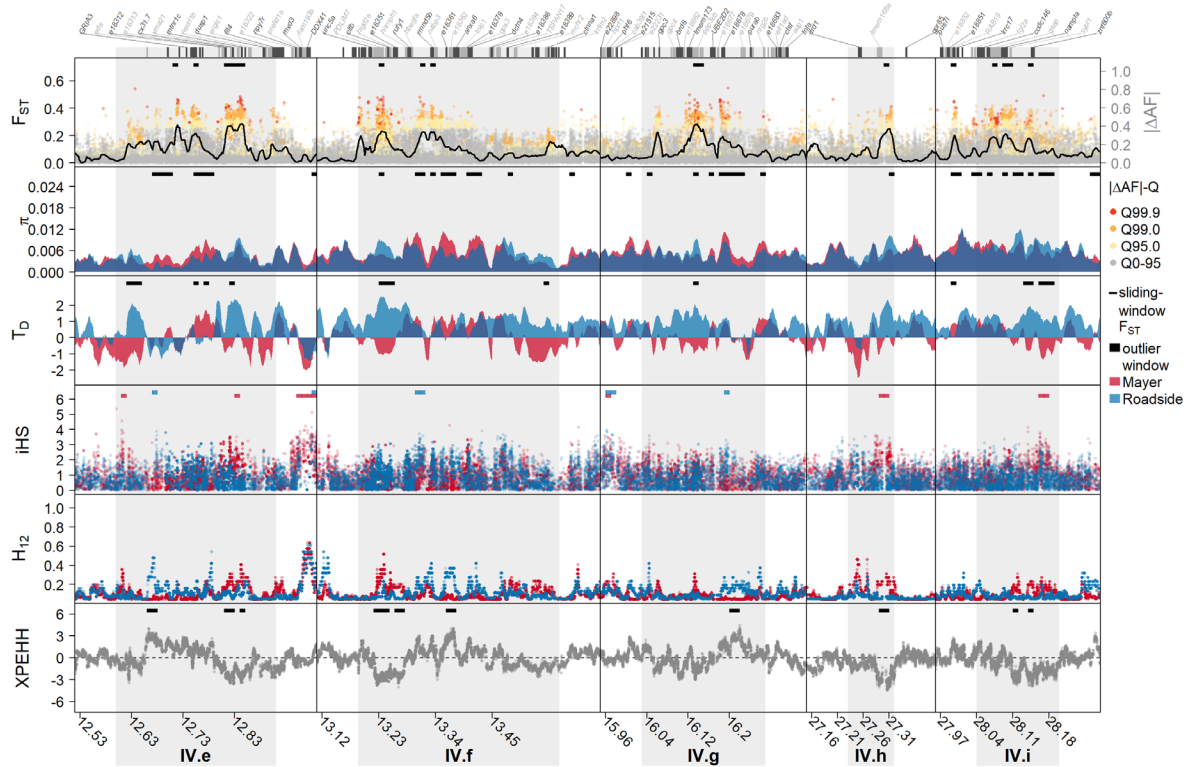

Supplementary Figure 10 | Local signatures of divergent selection on candidate genes. See Fig. 3 legend.

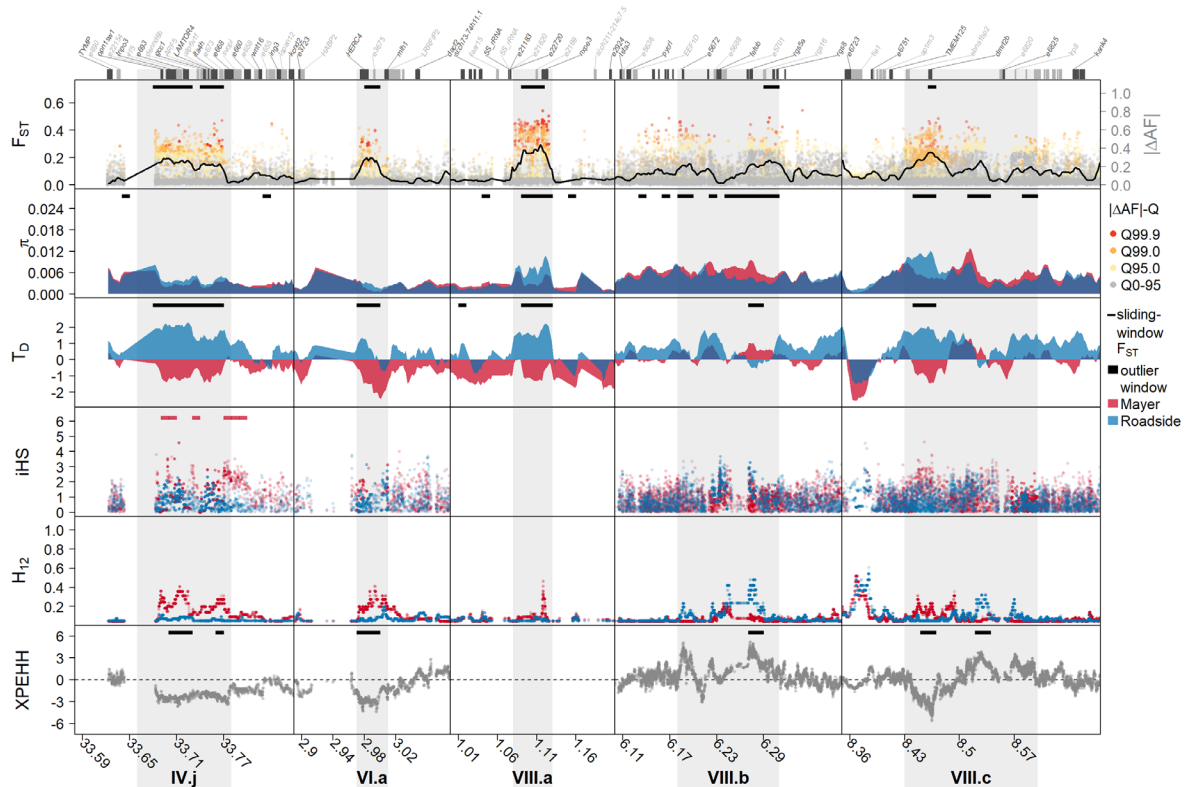



Supplementary Figure 11 | Local signatures of divergent selection on candidate genes. See Fig. 3 legend.

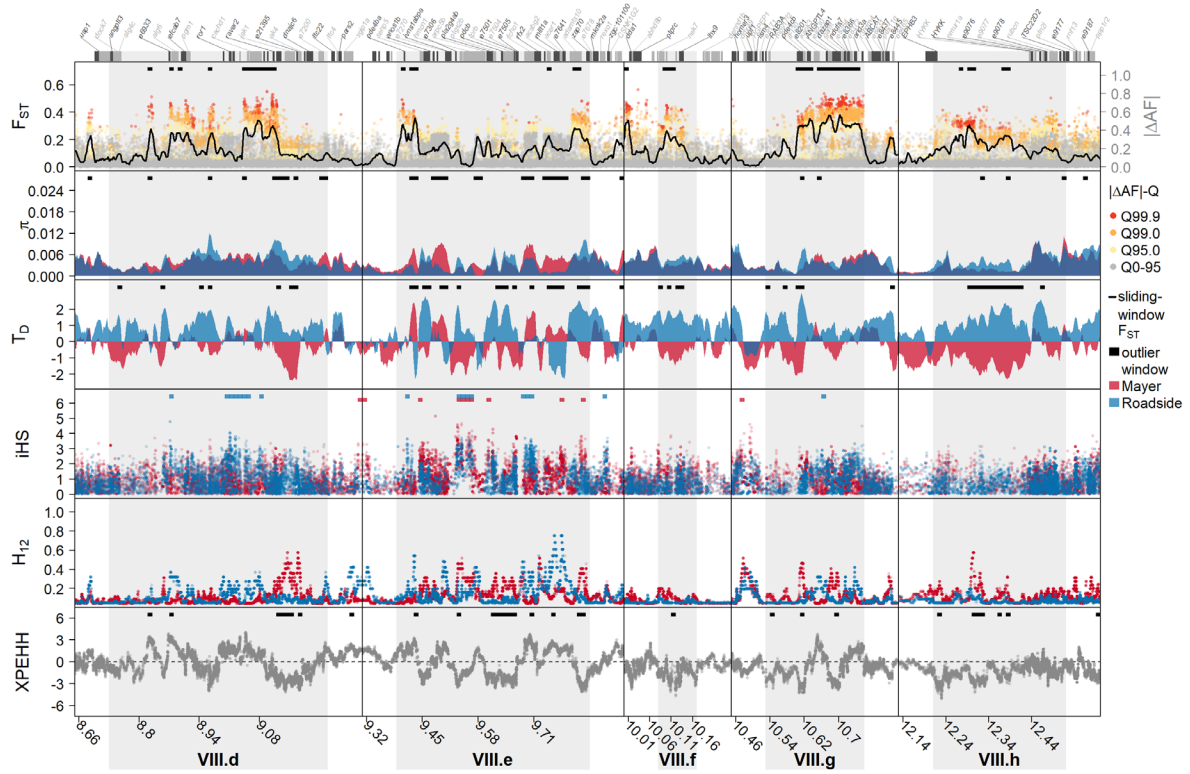

Supplementary Figure 12 | Local signatures of divergent selection on candidate genes. See Fig. 3 legend.

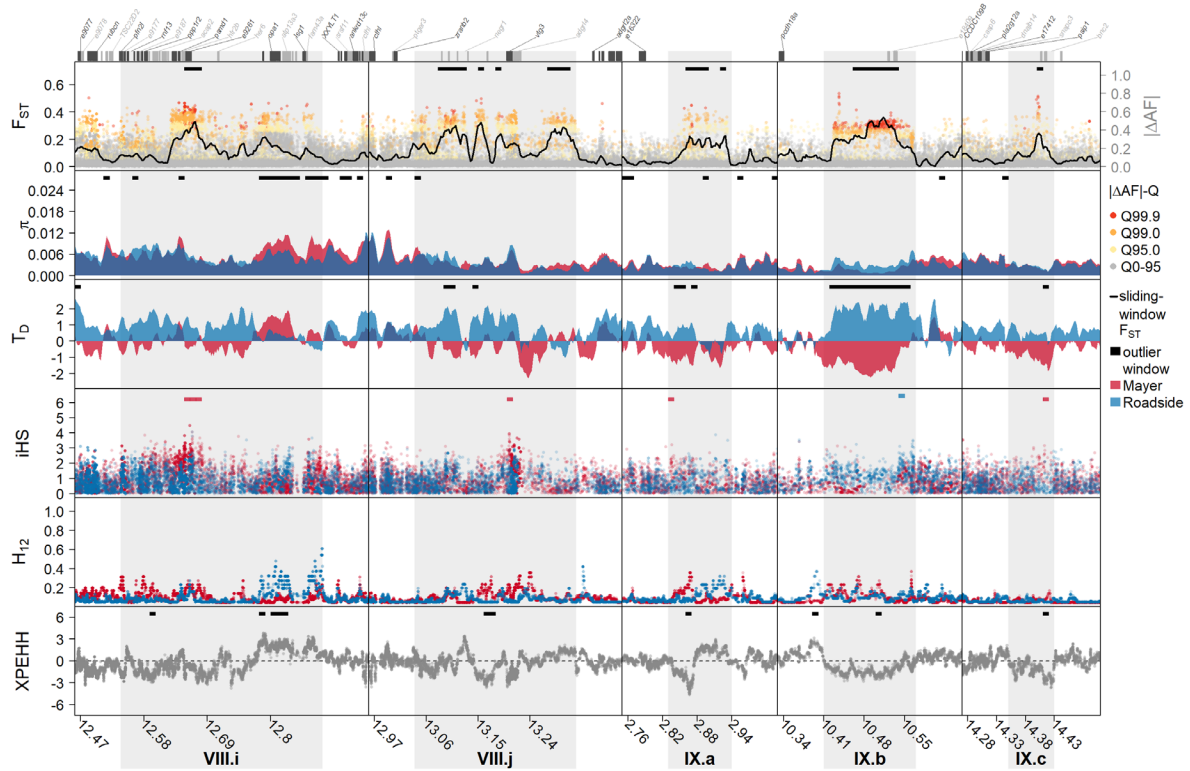

Supplementary Figure 13 | Local signatures of divergent selection on candidate genes. See Fig. 3 legend.

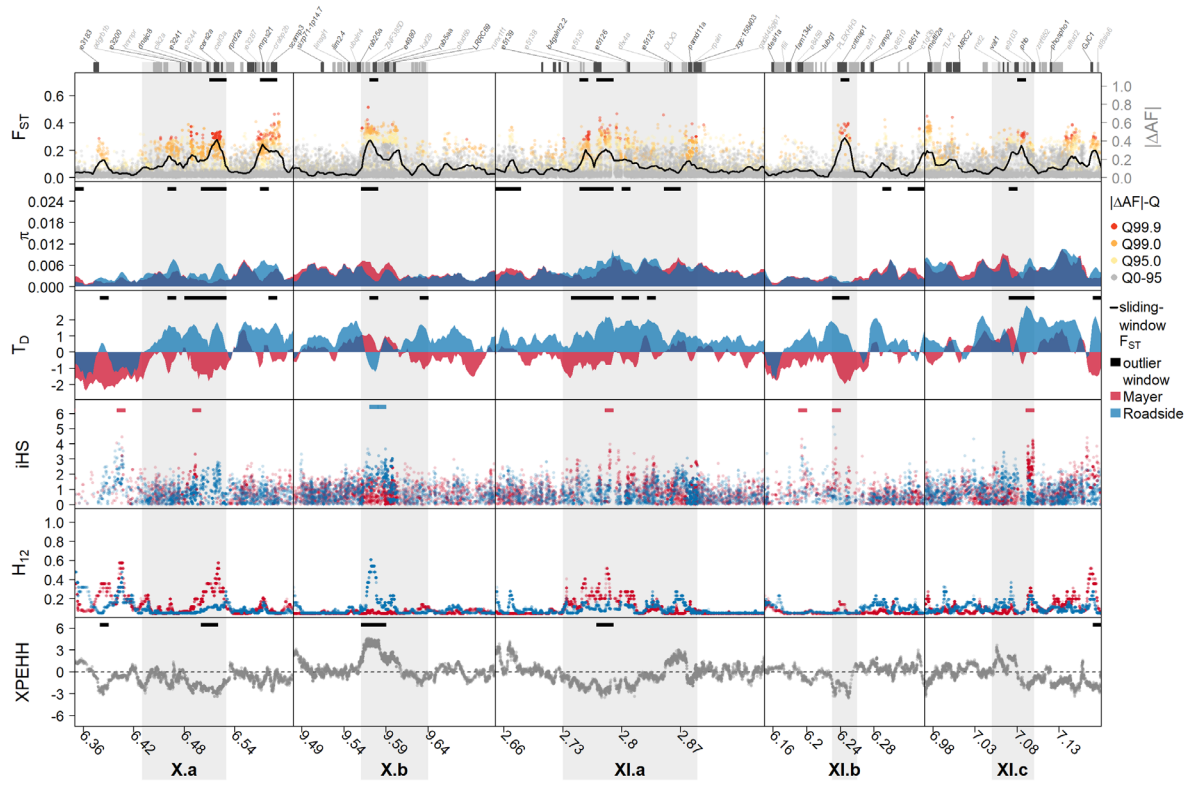

Supplementary Figure 14 | Local signatures of divergent selection on candidate genes. See Fig. 3 legend.

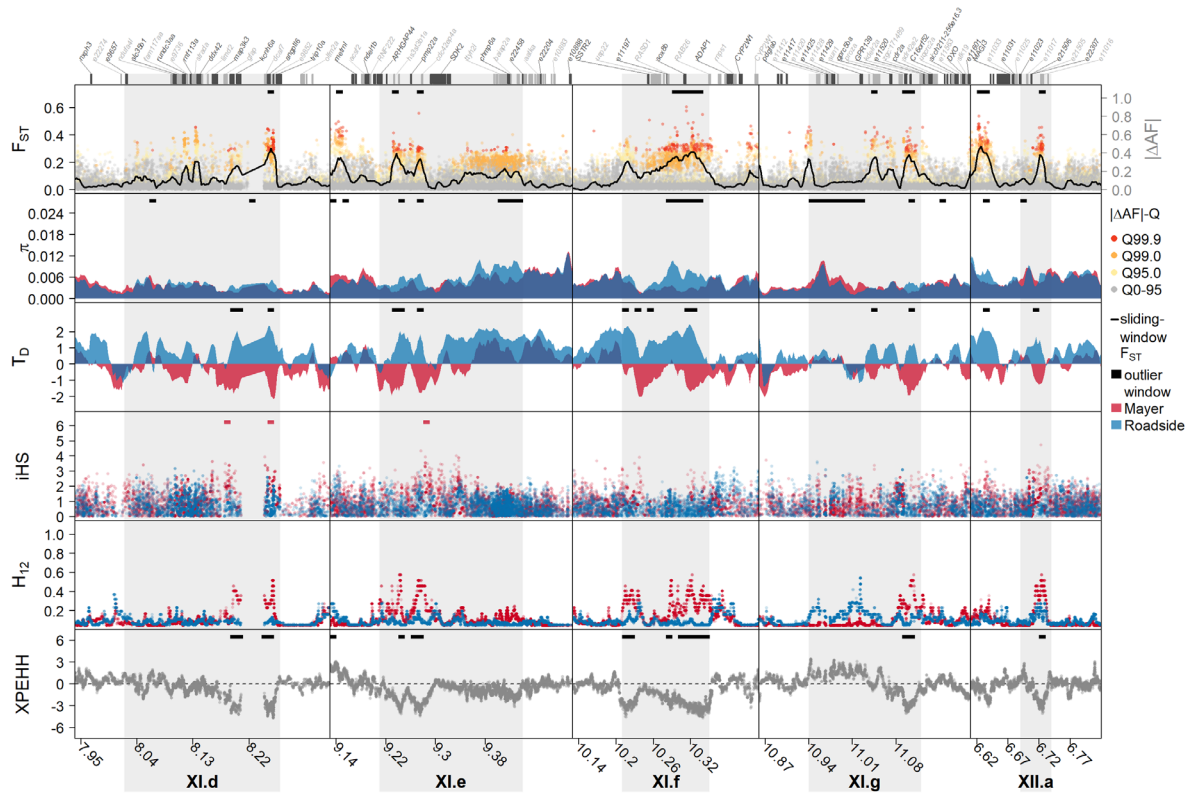

Supplementary Figure 15 | Local signatures of divergent selection on candidate genes. See Fig. 3 legend.

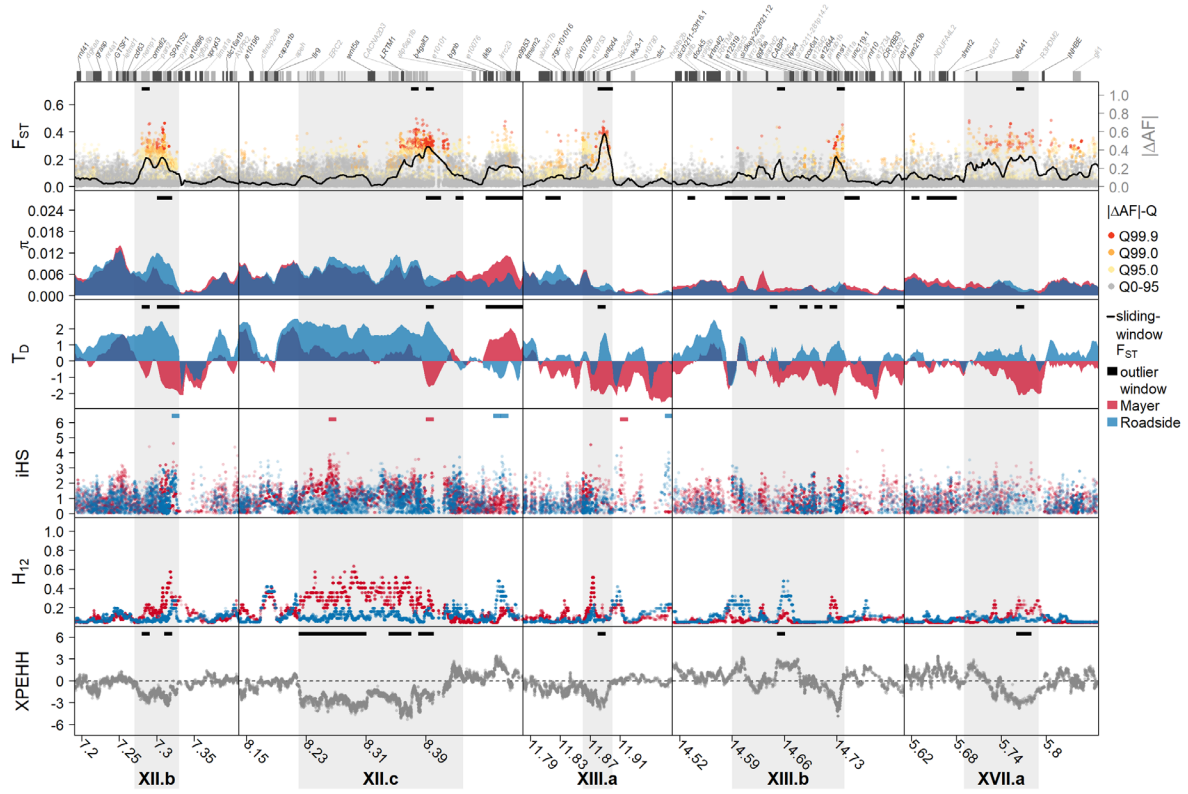

Supplementary Figure 16 | Local signatures of divergent selection on candidate genes. See Fig. 3 legend.

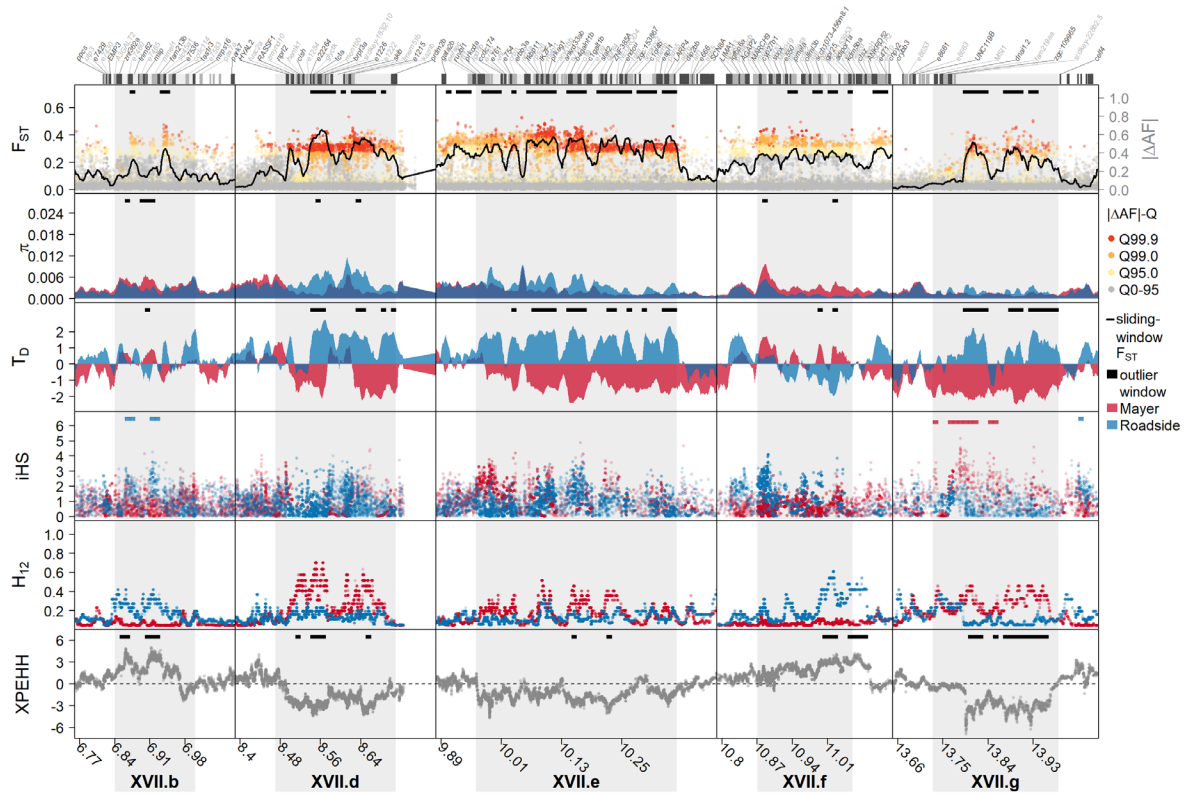

Supplementary Figure 17 | Local signatures of divergent selection on candidate genes. See Fig. 3 legend.

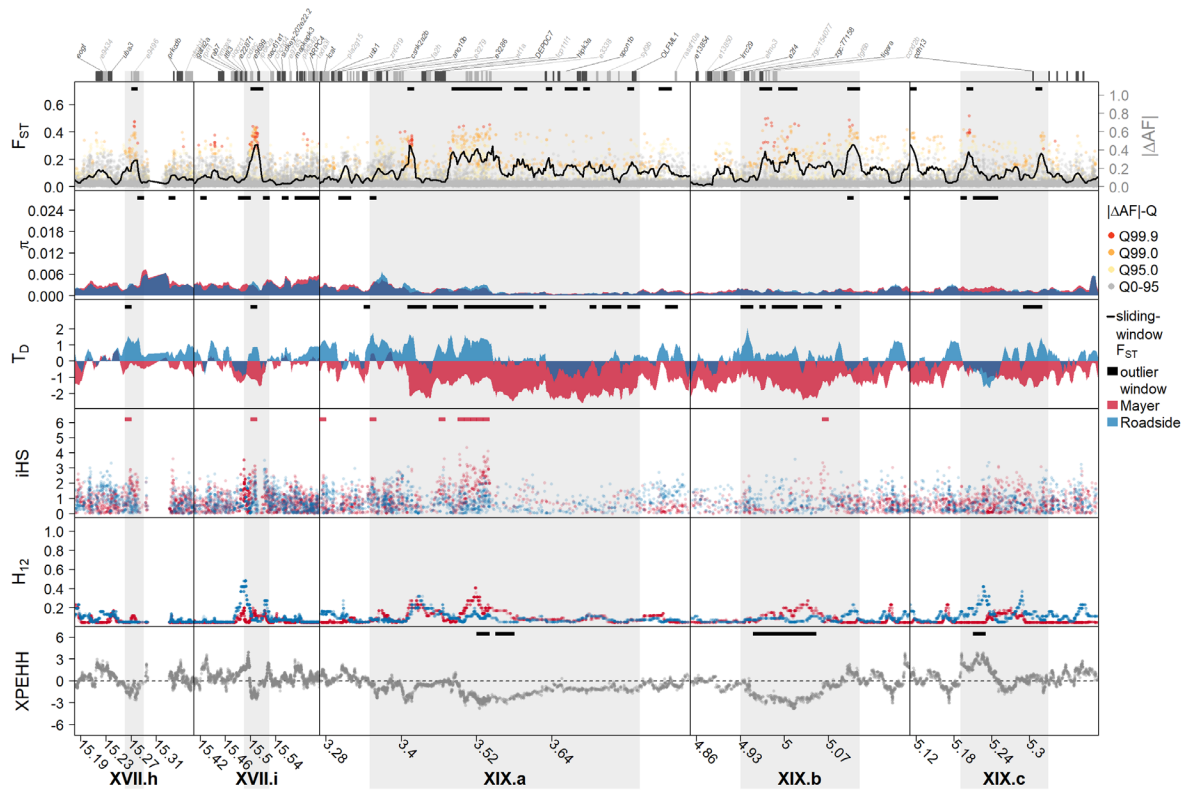

Supplementary Figure 18 | Local signatures of divergent selection on candidate genes. See Fig. 3 legend.

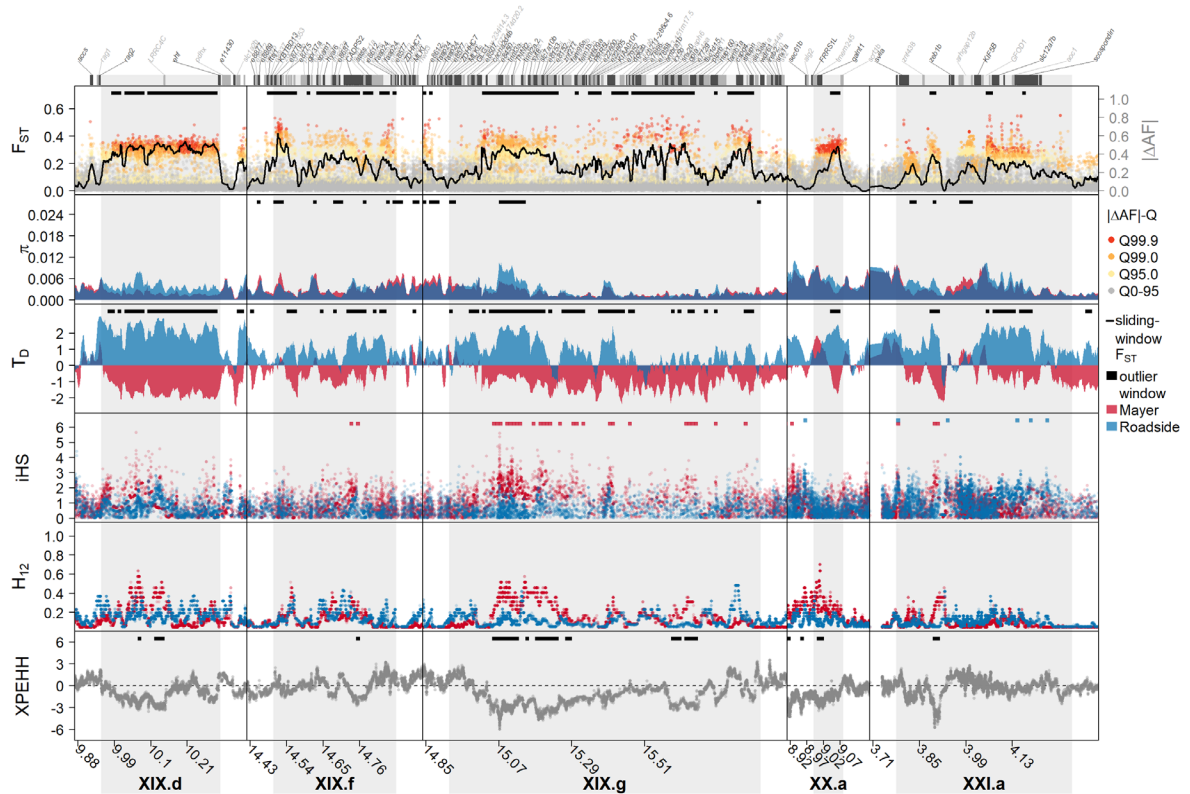

**Supplementary Figure 19 | Local signatures of divergent selection on candidate genes.** See Fig. 3 legend.

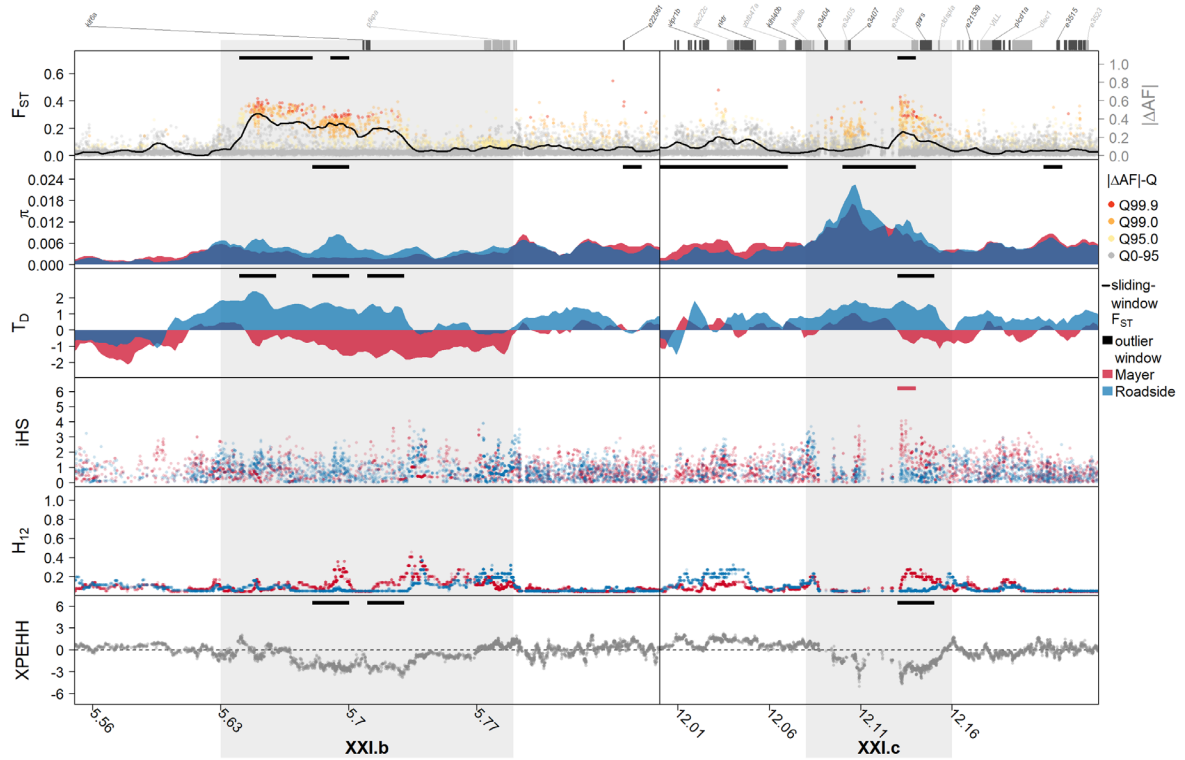

**Supplementary Figure 20 | Linkage disequilibrium (LD) between outlier regions in the selection experiment.** Several outlier regions in the source population, Mayer Lake, show higher LD between unlinked outlier regions than expected by chance from inter-chromosomal LD between neutral SNPs. In contrast, only a few outlier regions show inter-chromosomal LD in the transplant population, suggesting selection on many genomic regions instead of selection on one genomic region and a hitchhiking genomic background.

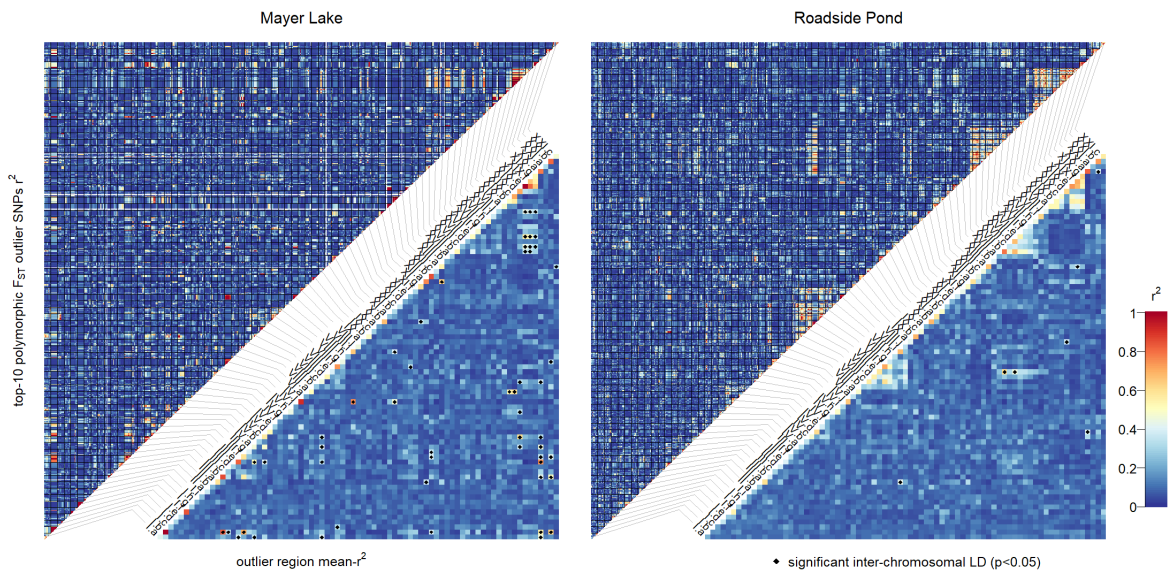

## Supplementary Data

**Supplementary Data 1 | Twelve demographic models fit to the observed data.** Specification of the models (.tpl) and parameter (.est) for each of the 12 tested demographic models used with fastsimcoal2 v2.6 (see Methods section). See Supplementary Fig. 2 for a visual representation of the models.

### MRCC.tpl

```
//Parameters for the coalescence simulation program : simcoal.exe
2
//Population effective sizes (number of genes)
NMAJR
200
//Samples sizes and samples age
24 5
22
//Growth rates: negative growth implies population expansion
0
0
//Number of migration matrices : 0 implies no migration between demes
0
//historical event: time, source, sink, migrants, new deme size, new growth rate, migration
matrix index
1 historical event
13 1 0 1 1 0 0
//Number of independent loci [chromosome]
1 0
//Per chromosome: Number of contiguous linkage Block: a block is a set of contiguous loci
1
//per Block:data type, number of loci, per generation recombination and mutation rates and
optional parameters
FREQ 1 0 1.7e-8 OUTEXP
```

### MRCC.est

```
// Priors and rules file
// *****
[PARAMETERS]
//#isInt? #name #dist.#min #max
//all Ns are in number of haploid individuals
1 NMAJR unif 1000 100000 output
[RULES]
[COMPLEX PARAMETERS]
```

### MRCB.tpl

```
//Parameters for the coalescence simulation program : simcoal.exe
2
//Population effective sizes (number of genes)
NMAJR
NRDSP
//Samples sizes and samples age
24 5
22
//Growth rates: negative growth implies population expansion
0
0
//Number of migration matrices : 0 implies no migration between demes
0
//historical event: time, source, sink, migrants, new deme size, new growth rate, migration
matrix index
2 historical event
7 1 1 1 RES1 0 0
13 1 0 1 1 0 0
//Number of independent loci [chromosome]
1 0
//Per chromosome: Number of contiguous linkage Block: a block is a set of contiguous loci
1
//per Block:data type, number of loci, per generation recombination and mutation rates and
optional parameters
FREQ 1 0 1.7e-8 OUTEXP
```

## MRCB.est

```
// Priors and rules file
// *****
[PARAMETERS]
//#isInt? #name #dist.#min #max
//all Ns are in number of haploid individuals
1 NMAYR unif 1000 100000 output
1 NRDSP unif 1000 10000 output
[RULES]
[COMPLEX PARAMETERS]
0 RES1 = 200/NRDSP
```

## MRCE.tpl

```
//Parameters for the coalescence simulation program : simcoal.exe
2
//Population effective sizes (number of genes)
NMAYR
NRDSP
//Samples sizes and samples age
24 5
22
//Growth rates: negative growth implies population expansion
0
RRAT
//Number of migration matrices : 0 implies no migration between demes
0
//historical event: time, source, sink, migrants, new deme size, new growth rate, migration
matrix index
2 historical event
13 1 1 1 1 0 0
13 1 0 1 1 0 0
//Number of independent loci [chromosome]
1 0
//Per chromosome: Number of contiguous linkage Block: a block is a set of contiguous loci
1
//per Block:data type, number of loci, per generation recombination and mutation rates and
optional parameters
FREQ 1 0 1.7e-8 OUTEXP
```

## MRCE.est

```
// Priors and rules file
// *****
[PARAMETERS]
//#isInt? #name #dist.#min #max
//all Ns are in number of haploid individuals
1 NMAYR unif 1000 100000 output
1 NRDSP unif 1000 10000 output
[RULES]
[COMPLEX PARAMETERS]
0 RATBB = 200/NRDSP hide
0 RCOF = log(RATBB) hide
0 RRAT = RCOF/13 hide
```

## MRGC.tpl

```
//Parameters for the coalescence simulation program : simcoal.exe
2
//Population effective sizes (number of genes)
NMAYR
200
//Samples sizes and samples age
24 5
22
//Growth rates: negative growth implies population expansion
0
0
//Number of migration matrices : 0 implies no migration between demes
0
//historical event: time, source, sink, migrants, new deme size, new growth rate, migration
matrix index
```

```

3 historical event
13 1 0 1 1 0 0
TMAX 0 0 1 1 GRAT 0
TCOL 0 0 1 1 0 0
//Number of independent loci [chromosome]
1 0
//Per chromosome: Number of contiguous linkage Block: a block is a set of contiguous loci
1
//per Block:data type, number of loci, per generation recombination and mutation rates and
optional parameters
FREQ 1 0 1.7e-8 OUTEXP

```

### MRGC.est

```

// Priors and rules file
// *****
[PARAMETERS]
//#isInt? #name #dist.#min #max
//all Ns are in number of haploid individuals
1 NMAYR unif 1000 100000 output
1 NANC unif 1000 100000 output
1 TCOL unif 3000 10000 output
0 PROP unif 0.1 0.9 hide
[RULES]
[COMPLEX PARAMETERS]
1 TMAX = TCOL*PROP output
1 TDIV = TCOL-TMAX hide
0 RATIO = NANC/NMAYR hide
0 RTEA = log(RATIO) hide
0 GRAT = RTEA/TDIV hide

```

### MRGB.tpl

```

//Parameters for the coalescence simulation program : simcoal.exe
2
//Population effective sizes (number of genes)
NMAYR
NRDSP
//Samples sizes and samples age
24 5
22
//Growth rates: negative growth implies population expansion
0
0
//Number of migration matrices : 0 implies no migration between demes
0
//historical event: time, source, sink, migrants, new deme size, new growth rate, migration
matrix index
4 historical event
7 1 1 1 RES1 0 0
13 1 0 1 1 0 0
TMAX 0 0 1 1 GRAT 0
TCOL 0 0 1 1 0 0
//Number of independent loci [chromosome]
1 0
//Per chromosome: Number of contiguous linkage Block: a block is a set of contiguous loci
1
//per Block:data type, number of loci, per generation recombination and mutation rates and
optional parameters
FREQ 1 0 1.7e-8 OUTEXP

```

### MRGB.est

```

// Priors and rules file
// *****
[PARAMETERS]
//#isInt? #name #dist.#min #max
//all Ns are in number of haploid individuals
1 NMAYR unif 1000 100000 output
1 NRDSP unif 1000 10000 output
1 NANC unif 1000 100000 output
1 TCOL unif 3000 10000 output
0 PROP unif 0.1 0.9 hide

```



```

[RULES]
[COMPLEX PARAMETERS]
1 TMAX = TCOL*PROP output
1 TDIV = TCOL-TMAX hide
0 RATIO = NANC/NMAYR hide
0 RTEA = log(RATIO) hide
0 GRAT = RTEA/TDIV hide
0 RES1 = 200/NRDSP

```

## MRGE.tpl

```

//Parameters for the coalescence simulation program : simcoal.exe
2
//Population effective sizes (number of genes)
NMAYR
NRDSP
//Samples sizes and samples age
24 5
22
//Growth rates: negative growth implies population expansion
0
RRAT
//Number of migration matrices : 0 implies no migration between demes
0
//historical event: time, source, sink, migrants, new deme size, new growth rate, migration
matrix index
4 historical event
13 1 1 1 1 0 0
13 1 0 1 1 0 0
TMAX 0 0 1 1 GRAT 0
TCOL 0 0 1 1 0 0
//Number of independent loci [chromosome]
1 0
//Per chromosome: Number of contiguous linkage Block: a block is a set of contiguous loci
1
//per Block:data type, number of loci, per generation recombination and mutation rates and
optional parameters
FREQ 1 0 1.7e-8 OUTEXP

```

## MRGE.est

```

// Priors and rules file
// *****
[PARAMETERS]
//#isInt? #name #dist.#min #max
//all Ns are in number of haploid individuals
1 NMAYR unif 1000 100000 output
1 NRDSP unif 1000 10000 output
1 NANC unif 1000 100000 output
1 TCOL unif 3000 10000 output
0 PROP unif 0.1 0.9 hide
[RULES]
[COMPLEX PARAMETERS]
1 TMAX = TCOL*PROP output
1 TDIV = TCOL-TMAX hide
0 RATIO = NANC/NMAYR hide
0 RTEA = log(RATIO) hide
0 GRAT = RTEA/TDIV hide
0 RATBB = 200/NRDSP hide
0 RCOF = log(RATBB) hide
0 RRAT = RCOF/13 hide

```

## MRBC.tpl

```

//Parameters for the coalescence simulation program : simcoal.exe
2
//Population effective sizes (number of genes)
NMAYR
200
//Samples sizes and samples age
24 5
22
//Growth rates: negative growth implies population expansion

```

```

0
0
//Number of migration matrices : 0 implies no migration between demes
0
//historical event: time, source, sink, migrants, new deme size, new growth rate, migration
matrix index
3 historical event
13 1 0 1 1 0 0
TEND 0 0 1 RES2 0 0
TBOT 0 0 1 BTST 0 0
//Number of independent loci [chromosome]
1 0
//Per chromosome: Number of contiguous linkage Block: a block is a set of contiguous loci
1
//per Block:data type, number of loci, per generation recombination and mutation rates and
optional parameters
FREQ 1 0 1.7e-8 OUTEXP

```

### MRBC.est

```

// Priors and rules file
// *****
[PARAMETERS]
//#isInt? #name #dist.#min #max
//all Ns are in number of haploid individuals
1 NMAYR unif 10000 100000 output
1 NANC unif 10000 1000000 output
1 BTST unif 2 100 output
1 TBOT unif 3000 10000 output
1 LEBO unif 20 200
[RULES]
[COMPLEX PARAMETERS]
1 TEND = TBOT-LEBO output
1 NCOL = NANC/BTST output
0 RES2 = NCOL/NMAYR hide
0 RES1 = NMAYR/NCOL hide

```

### MRBB.tpl

```

//Parameters for the coalescence simulation program : simcoal.exe
2
//Population effective sizes (number of genes)
NMAYR
NRDSP
//Samples sizes and samples age
24 5
22
//Growth rates: negative growth implies population expansion
0
0
//Number of migration matrices : 0 implies no migration between demes
0
//historical event: time, source, sink, migrants, new deme size, new growth rate, migration
matrix index
4 historical event
7 1 1 1 RES1 0 0
13 1 0 1 1 0 0
TEND 0 0 1 RES2 0 0
TBOT 0 0 1 BTST 0 0
//Number of independent loci [chromosome]
1 0
//Per chromosome: Number of contiguous linkage Block: a block is a set of contiguous loci
1
//per Block:data type, number of loci, per generation recombination and mutation rates and
optional parameters
FREQ 1 0 1.7e-8 OUTEXP

```

### MRBB.est

```

// Priors and rules file
// *****
[PARAMETERS]
//#isInt? #name #dist.#min #max

```

```

//all Ns are in number of haploid individuals
1 NMAYR unif 1000 100000 output
1 NRDSP unif 1000 10000 output
1 NANC unif 1000 100000 output
1 BTST unif 2 100 output
1 TBOT unif 3000 10000 output
1 LEBO unif 20 200
[RULES]
[COMPLEX PARAMETERS]
1 TEND = TBOT-LEBO output
1 NCOL = NANC/BTST output
0 RES2 = NCOL/NMAYR hide
0 RES1 = 200/NRDSP hide

```

## MRBE.tpl

```

//Parameters for the coalescence simulation program : simcoal.exe
2
//Population effective sizes (number of genes)
NMAYR
NRDSP
//Samples sizes and samples age
24 5
22
//Growth rates: negative growth implies population expansion
0
RRAT
//Number of migration matrices : 0 implies no migration between demes
0
//historical event: time, source, sink, migrants, new deme size, new growth rate, migration
matrix index
4 historical event
13 1 1 1 1 0 0
13 1 0 1 1 0 0
TEND 0 0 1 RES2 0 0
TBOT 0 0 1 BTST 0 0
//Number of independent loci [chromosome]
1 0
//Per chromosome: Number of contiguous linkage Block: a block is a set of contiguous loci
1
//per Block:data type, number of loci, per generation recombination and mutation rates and
optional parameters
FREQ 1 0 1.7e-8 OUTEXP

```

## MRBE.est

```

// Priors and rules file
// *****
[PARAMETERS]
//#isInt? #name #dist.#min #max
//all Ns are in number of haploid individuals
1 NMAYR unif 10000 100000 output
1 NRDSP unif 1000 10000 output
1 NANC unif 10000 1000000 output
1 BTST unif 2 100 output
1 TBOT unif 3000 10000 output
1 LEBO unif 20 200
[RULES]
[COMPLEX PARAMETERS]
1 TEND = TBOT-LEBO output
1 NCOL = NANC/BTST output
0 RES2 = NCOL/NMAYR hide
0 RATBB = 200/NRDSP hide
0 RCOF = log(RATBB) hide
0 RRAT = RCOF/13 hide

```

## MREC.tpl

```

//Parameters for the coalescence simulation program : simcoal.exe
2
//Population effective sizes (number of genes)
NMAYR
200

```

```

//Samples sizes and samples age
24 5
22
//Growth rates: negative growth implies population expansion
0
0
//Number of migration matrices : 0 implies no migration between demes
0
//historical event: time, source, sink, migrants, new deme size, new growth rate, migration
matrix index
3 historical event
13 1 0 1 1 0 0
TMAX 0 0 1 1 GRAT 0
TBOT 0 0 1 BTST 0 0
//Number of independent loci [chromosome]
1 0
//Per chromosome: Number of contiguous linkage Block: a block is a set of contiguous loci
1
//per Block:data type, number of loci, per generation recombination and mutation rates and
optional parameters
FREQ 1 0 1.7e-8 OUTEXP

```

### MREC.est

```

// Priors and rules file
// *****
[PARAMETERS]
//#isInt? #name #dist.#min #max
//all Ns are in number of haploid individuals
1 NMAYR unif 10000 100000 output
1 NANC unif 10000 1000000 output
1 BTST unif 2 100 output
1 TBOT unif 3000 10000 output
0 PROP unif 0.1 0.9 hide
[RULES]
[COMPLEX PARAMETERS]
1 TMAX = TBOT*PROP output
1 NCOL = NANC/BTST output
0 RES1 = NMAYR/(NANC/BTST) hide
1 TDIV = TBOT-TMAX hide
0 RATIO = (NANC/BTST)/NMAYR hide
0 RTEA = log(RATIO) hide
0 GRAT = RTEA/TDIV hide

```

### MREB.tpl

```

//Parameters for the coalescence simulation program : simcoal.exe
2
//Population effective sizes (number of genes)
NMAYR
NRDSP
//Samples sizes and samples age
24 5
22
//Growth rates: negative growth implies population expansion
0
0
//Number of migration matrices : 0 implies no migration between demes
0
//historical event: time, source, sink, migrants, new deme size, new growth rate, migration
matrix index
4 historical event
7 1 1 1 RES1 0 0
13 1 0 1 1 0 0
TMAX 0 0 1 1 GRAT 0
TBOT 0 0 1 BTST 0 0
//Number of independent loci [chromosome]
1 0
//Per chromosome: Number of contiguous linkage Block: a block is a set of contiguous loci
1
//per Block:data type, number of loci, per generation recombination and mutation rates and
optional parameters
FREQ 1 0 1.7e-8 OUTEXP

```

## MREB.est

```
// Priors and rules file
// *****
[PARAMETERS]
//#isInt? #name #dist.#min #max
//all Ns are in number of haploid individuals
1 NMAYR unif 10000 100000 output
1 NRDSP unif 1000 10000 output
1 NANC unif 10000 1000000 output
1 BTST unif 2 100 output
1 TBOT unif 3000 10000 output
0 PROP unif 0.1 0.9 hide
[RULES]
[COMPLEX PARAMETERS]
1 TMAX = TBOT*PROP output
1 NCOL = NANC/BTST output
1 TDIV = TBOT-TMAX hide
0 RATIO = (NANC/BTST)/NMAYR hide
0 RTEA = log(RATIO) hide
0 GRAT = RTEA/TDIV hide
0 RATBB = 200/NRDSP hide
0 RCOF = log(RATBB) hide
0 RRAT = RCOF/13 hide
0 RES1 = 200/NRDSP
```

## MREE.tpl

```
//Parameters for the coalescence simulation program : simcoal.exe
2
//Population effective sizes (number of genes)
NMAYR
NRDSP
//Samples sizes and samples age
24 5
22
//Growth rates: negative growth implies population expansion
0
RRAT
//Number of migration matrices : 0 implies no migration between demes
0
//historical event: time, source, sink, migrants, new deme size, new growth rate, migration
matrix index
4 historical event
13 1 1 1 1 0 0
13 1 0 1 1 0 0
TMAX 0 0 1 1 GRAT 0
TBOT 0 0 1 BTST 0 0
//Number of independent loci [chromosome]
1 0
//Per chromosome: Number of contiguous linkage Block: a block is a set of contiguous loci
1
//per Block:data type, number of loci, per generation recombination and mutation rates and
optional parameters
FREQ 1 0 1.7e-8 OUTEXP
```

## MREE.est

```
// Priors and rules file
// *****
[PARAMETERS]
//#isInt? #name #dist.#min #max
//all Ns are in number of haploid individuals
1 NMAYR unif 10000 100000 output
1 NRDSP unif 1000 10000 output
1 NANC unif 10000 1000000 output
1 BTST unif 2 100 output
1 TBOT unif 3000 10000 output
0 PROP unif 0.1 0.9 hide
[RULES]
[COMPLEX PARAMETERS]
1 TMAX = TBOT*PROP output
1 NCOL = NANC/BTST output
```

0 RES1 = NMAYR/(NANC/BTST) hide  
1 TDIV = TBOT-TMAX hide  
0 RATIO = (NANC/BTST)/NMAYR hide  
0 RTEA = log(RATIO) hide  
0 GRAT = RTEA/TDIV hide  
0 RATBB = 200/NRDSP hide  
0 RCOF = log(RATBB) hide  
0 RRAT = RCOF/13 hide
